# Supplementary material for: Salt loading in MOFs: solvent-free and solvent-assisted loading of NH4NO3 and LiNO3 in UiO-66
Source: Royal Society of Chemistry journal article supplement (doi:10.1039/c9dt02489a), 2019-01-01
Supplement: c9dt02489a1.pdf [file c9dt02489a1.pdf]

## SUPPORTING INFORMATION

# Salt Loading in MOFs: Solvent-Free and Solvent-Assisted Loading of $\text{NH}_4\text{NO}_3$ and $\text{LiNO}_3$ in UiO-66

Saona Seth,<sup>†</sup> Thomas P. Vaid,<sup>†</sup> and Adam J. Matzger<sup>\*†‡</sup>

<sup>†</sup>*Department of Chemistry, University of Michigan, 930 North University Ave, Ann Arbor, MI 48109, USA.*

<sup>‡</sup>*Department of Macromolecular Science and Engineering Program, University of Michigan, 930 North University Ave, Ann Arbor, MI 48109, USA.*

---

### Table of Contents

|                                                                                    |      |
|------------------------------------------------------------------------------------|------|
| Nitrogen sorption isotherm of UiO-66                                               | S-2  |
| PXRD patterns of UiO-66, $\text{NH}_4\text{NO}_3$ , and composite                  | S-3  |
| SEM and elemental mapping of $\text{NH}_4\text{NO}_3$ -UiO-66 mixture              | S-4  |
| SEM and elemental mapping of $\text{NH}_4\text{NO}_3$ -UiO-66 composite            | S-5  |
| PXRD patterns $\text{LiNO}_3$ -UiO-66 composite with 38 and 40 wt% $\text{LiNO}_3$ | S-6  |
| Nitrogen sorption isotherm of $\text{LiNO}_3$ -UiO-66 (20 wt% $\text{LiNO}_3$ )    | S-7  |
| TGA of $\text{LiNO}_3$ -UiO-66 composite                                           | S-8  |
| SEM and elemental mapping of $\text{LiNO}_3$ -UiO-66 mixture                       | S-9  |
| SEM and elemental mapping of $\text{LiNO}_3$ -UiO-66 composite                     | S-10 |
| Text concerning the energetic properties of the composites                         | S-11 |
| References                                                                         | S-12 |

---

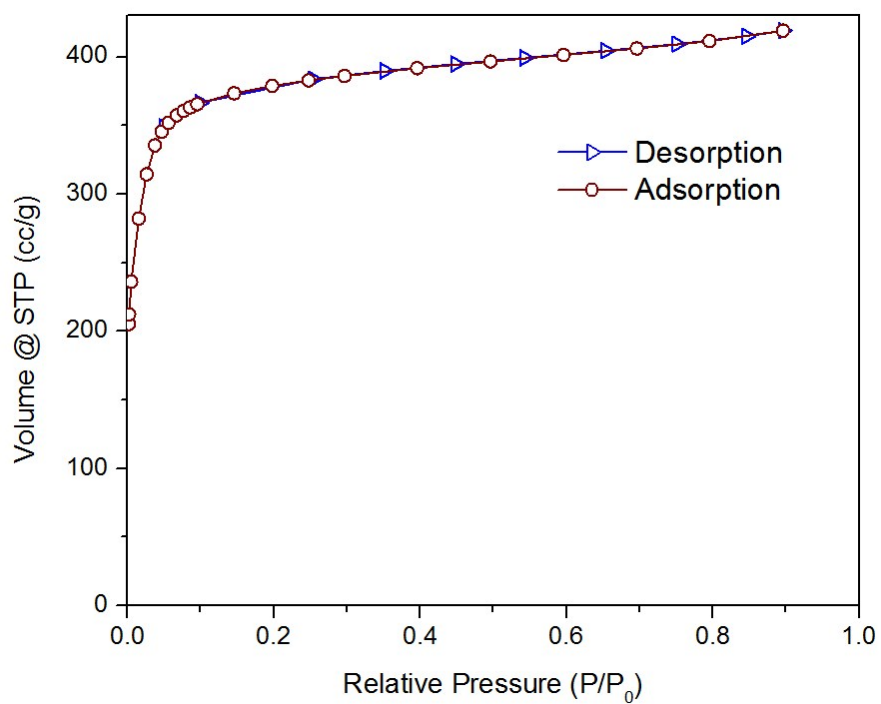

**Fig. S1.** Nitrogen sorption isotherm of UiO-66 at 77 K. BET surface area of the material is calculated to be 1530 m<sup>2</sup> g<sup>-1</sup>.

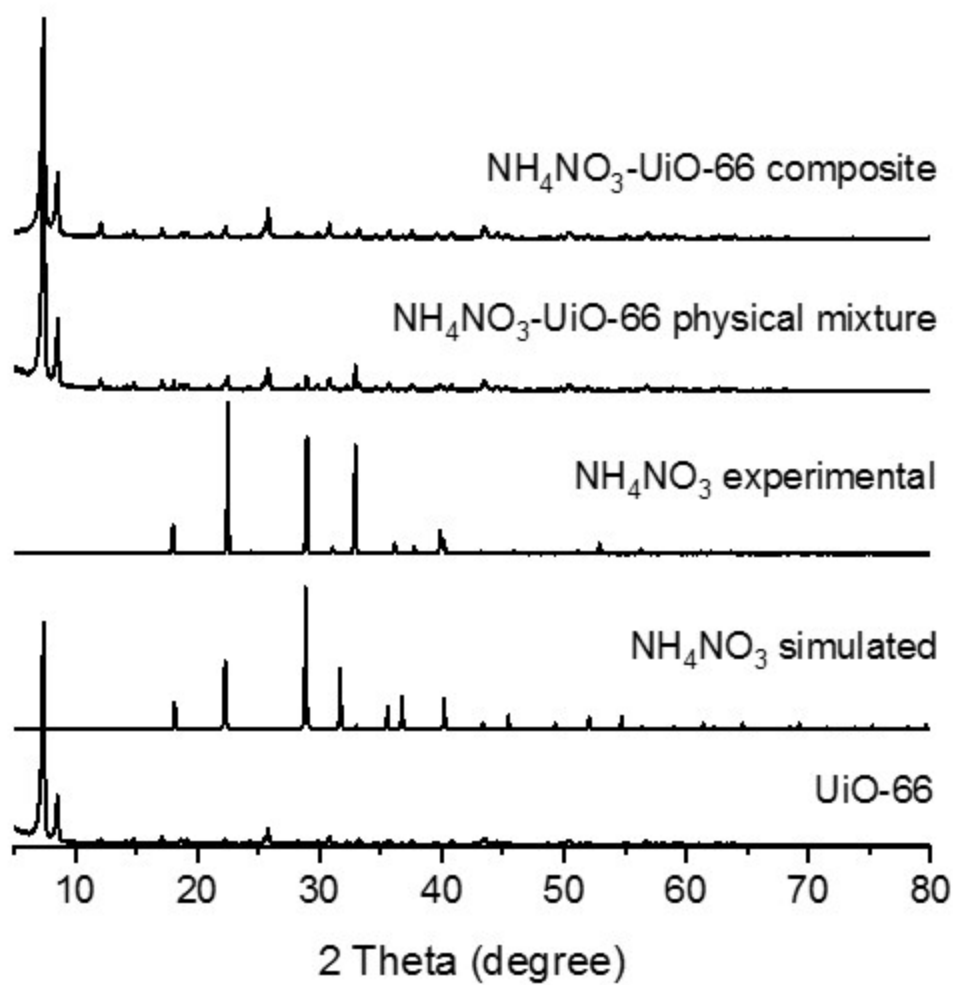

**Fig. S2.** Powder X-ray diffraction patterns of UiO-66, NH<sub>4</sub>NO<sub>3</sub>, a physical mixture of the two, and the UiO-66-NH<sub>4</sub>NO<sub>3</sub> composite.

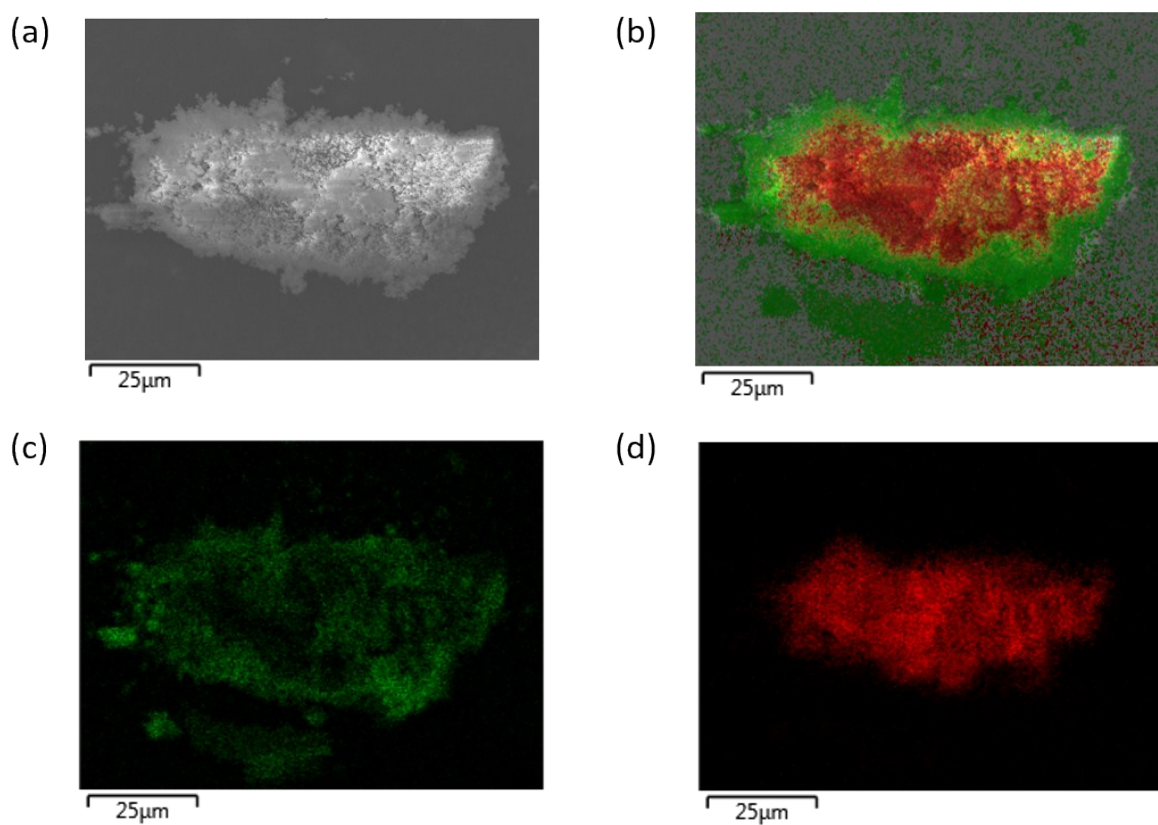

**Fig. S3.** (a) SEM image of a ground mixture of  $\text{NH}_4\text{NO}_3$  and UiO-66 and elemental mapping of (c) zirconium (green), (d) nitrogen (red) and (b) both elements based on EDS analysis.

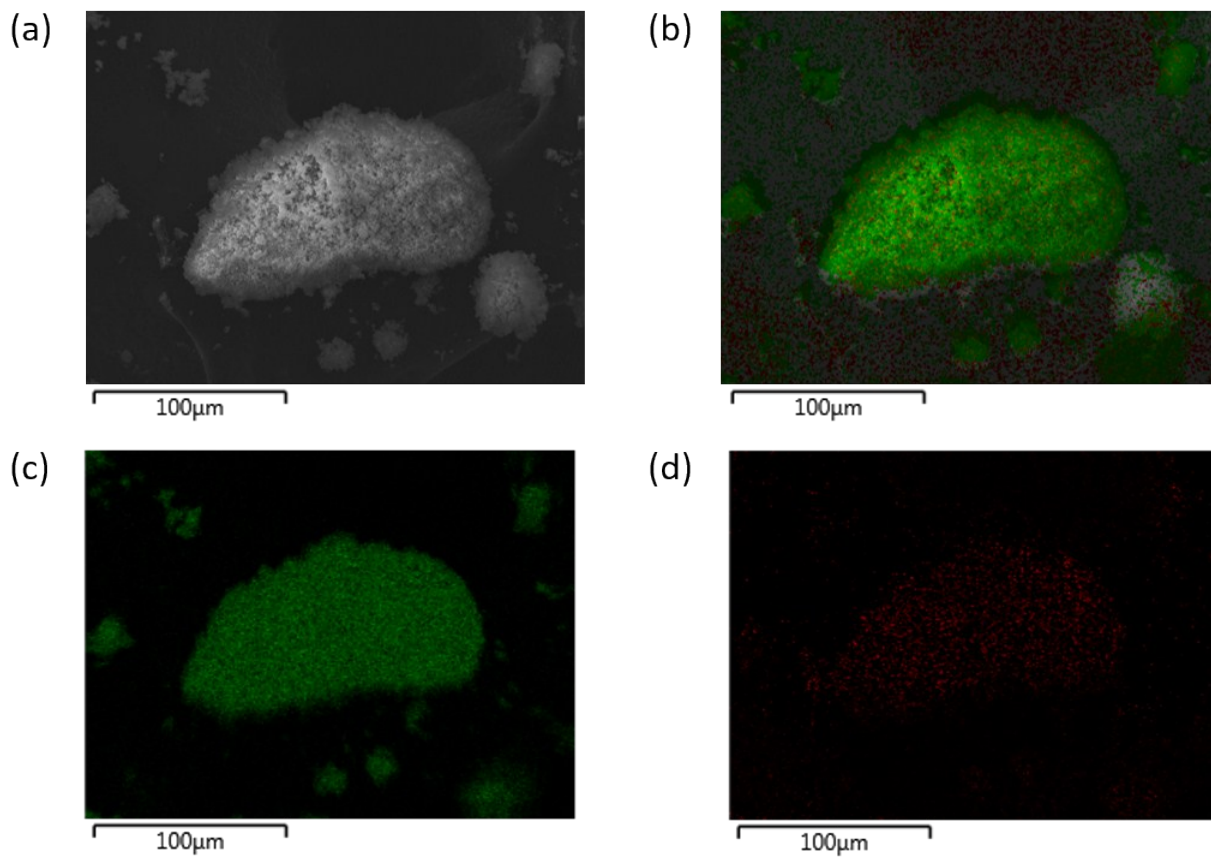

**Fig. S4.** (a) SEM image of  $\text{NH}_4\text{NO}_3\text{-UiO-66}$  composite and elemental mapping of (c) zirconium (green), (d) nitrogen (red) and (b) both elements based on EDS analysis.

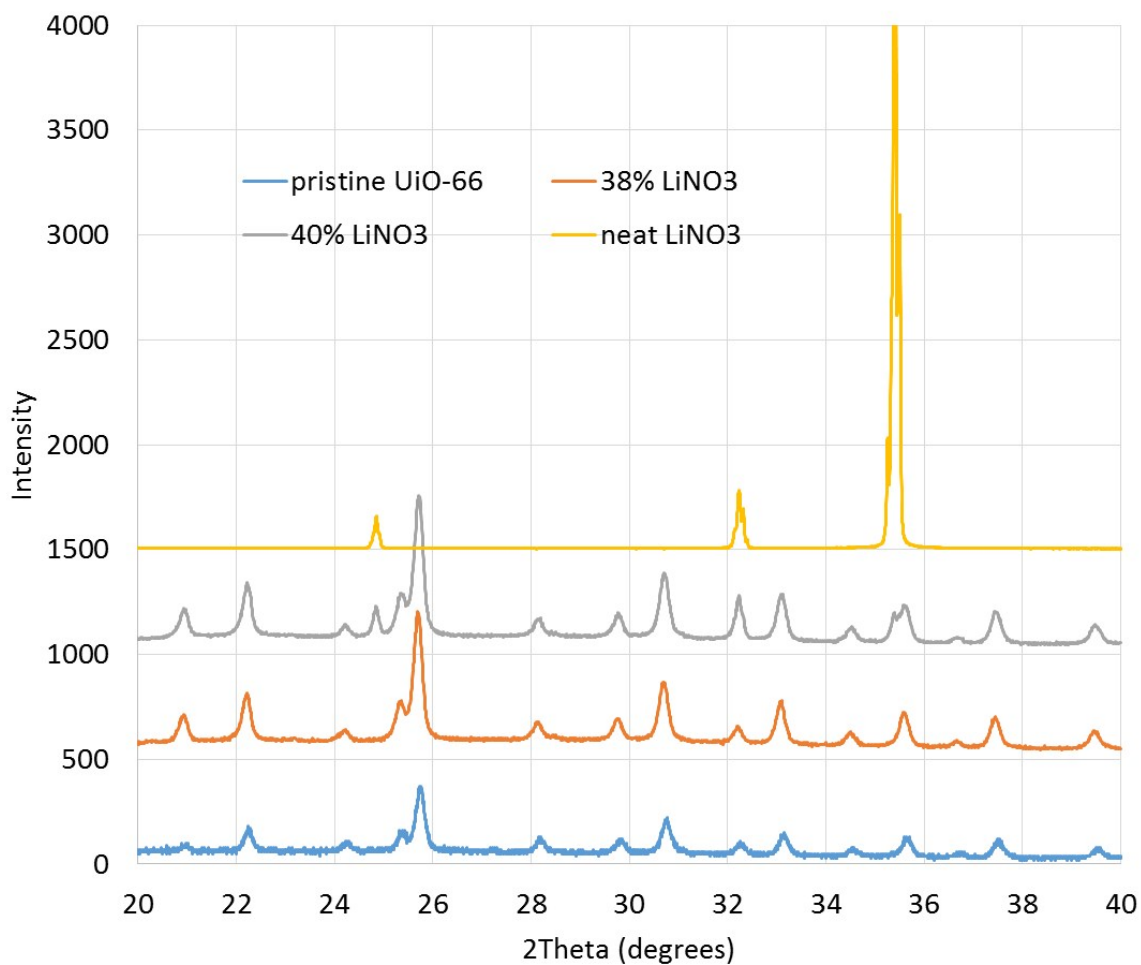

**Fig. S5.** PXRD patterns of (bottom to top) UiO-66, LiNO<sub>3</sub>-UiO-66 composite with 38 wt% LiNO<sub>3</sub>, LiNO<sub>3</sub>-UiO-66 composite with 40 wt% LiNO<sub>3</sub>, and neat LiNO<sub>3</sub>. Peaks at  $2\theta = 24.8^\circ$  and  $35.4^\circ$  due to crystalline LiNO<sub>3</sub> are evident in the 40 wt% LiNO<sub>3</sub> composite (meaning there is unloaded, crystalline LiNO<sub>3</sub> on the exterior of the MOF) but not in the 38 wt% LiNO<sub>3</sub> composite.

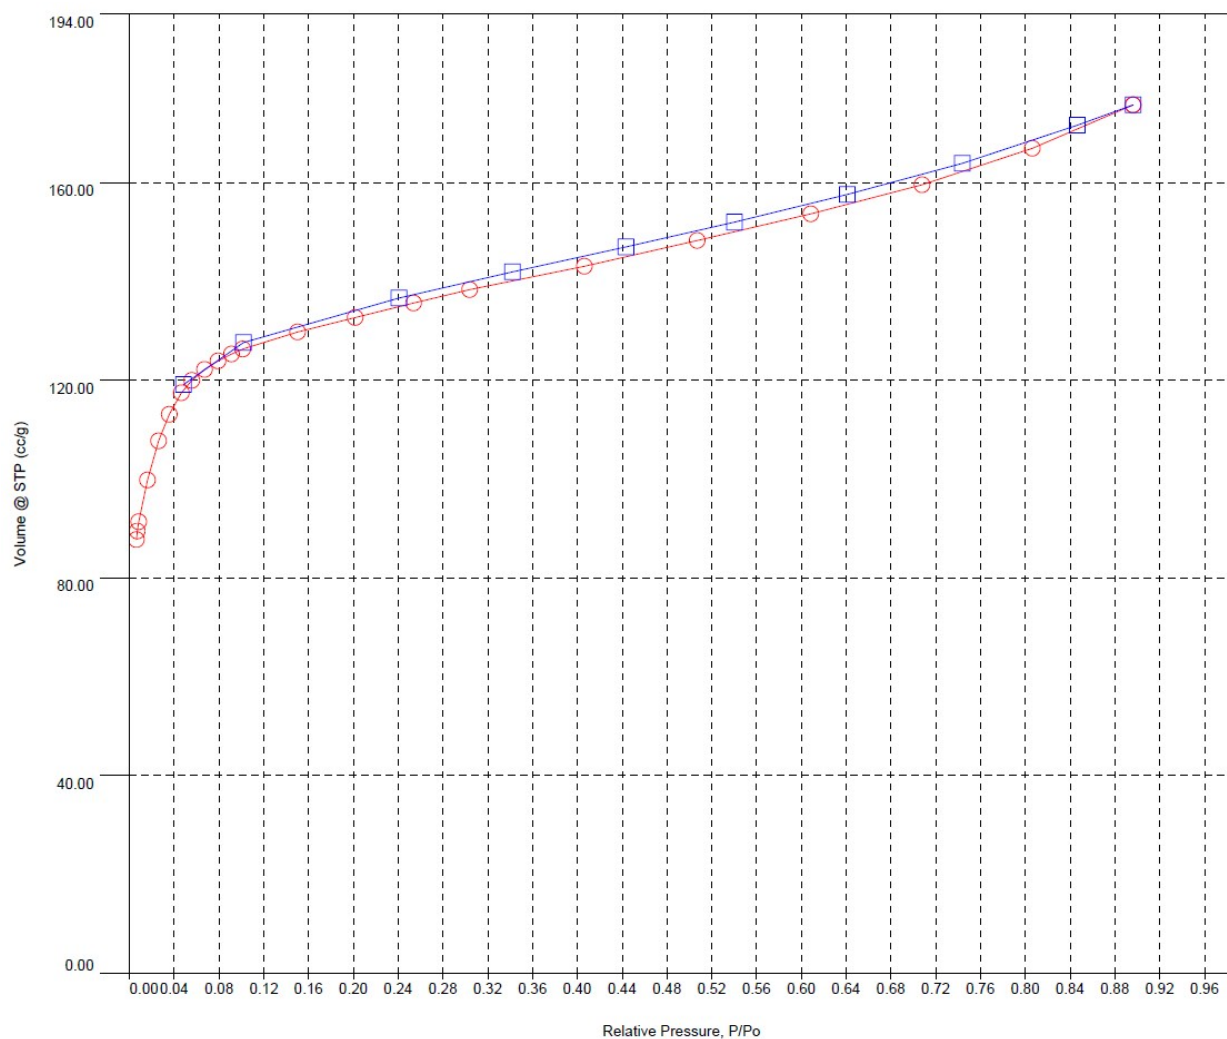

**Fig. S6.** Nitrogen sorption isotherm of  $\text{LiNO}_3\text{-UiO-66}$  (20 wt%  $\text{LiNO}_3$ ) at 77 K. BET surface area of the material is calculated to be  $528 \text{ m}^2 \text{ g}^{-1}$ , compared to  $1098 \text{ m}^2 \text{ g}^{-1}$  for this sample of UiO-66 in its pristine state.

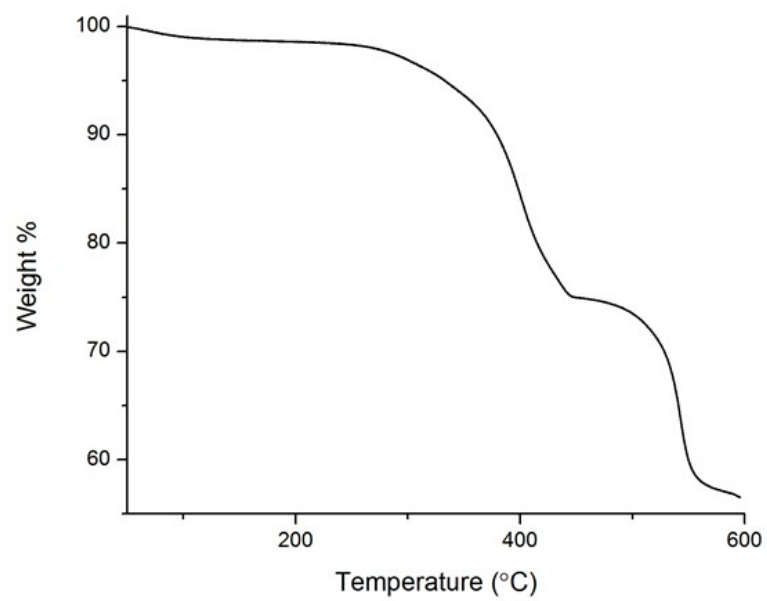

**Fig. S7.** TGA thermogram of LiNO<sub>3</sub>-UiO-66 composite.



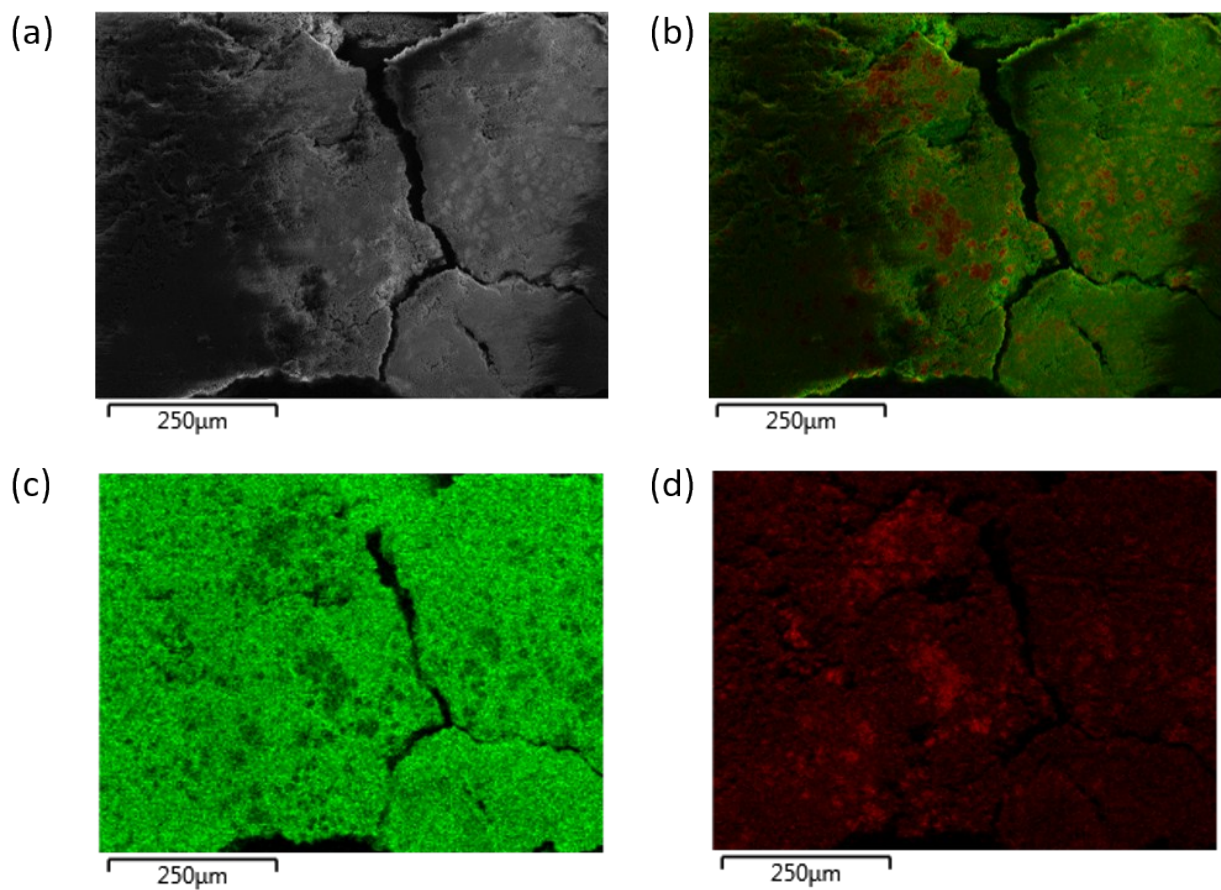

**Fig. S8.** (a) SEM image of a ground mixture of  $\text{LiNO}_3$  and UiO-66 and elemental mapping of (c) zirconium (green), (d) nitrogen (red) and (b) both elements based on EDS analysis.

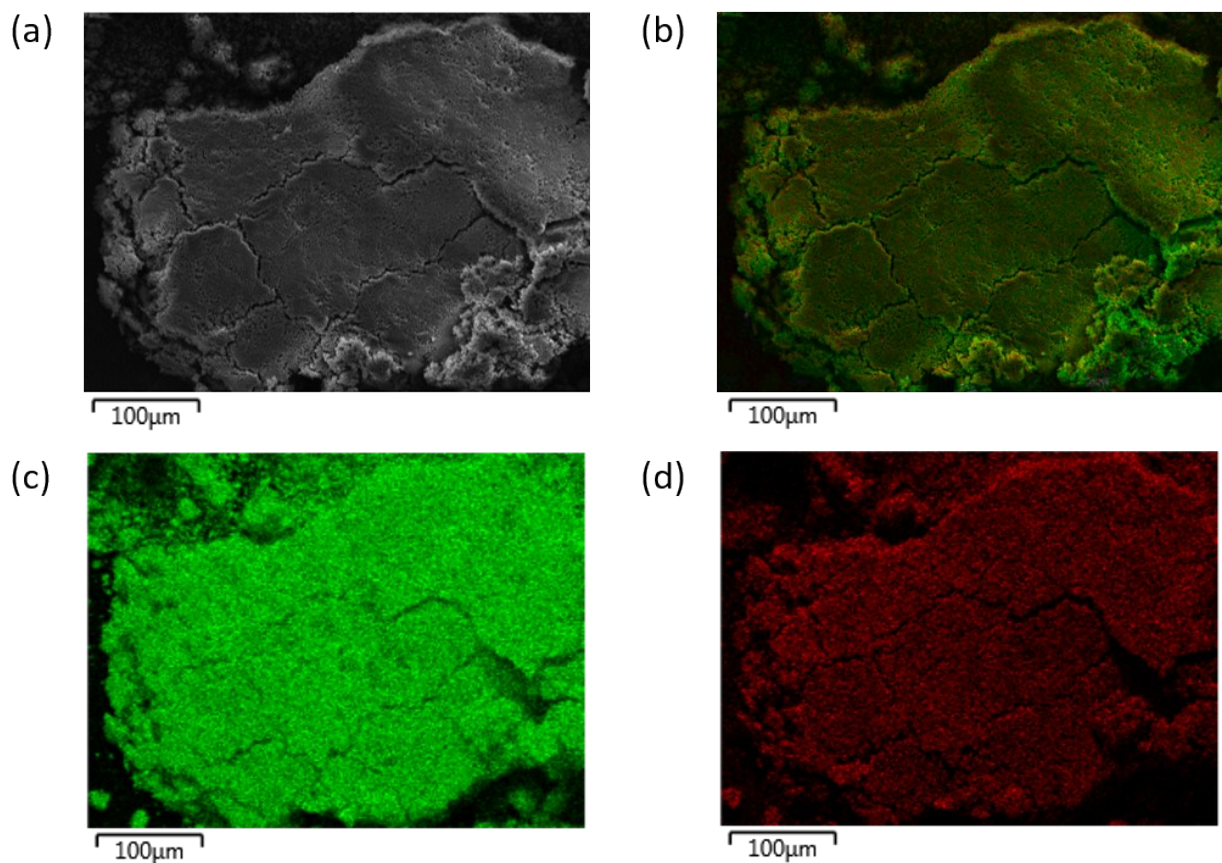

**Fig. S9.** (a) SEM image of  $\text{LiNO}_3\text{-UiO-66}$  composite and elemental mapping of (c) zirconium (green), (d) nitrogen (red) and (b) both elements based on EDS analysis.

## **Energetic Properties of $\text{NH}_4\text{NO}_3$ -UiO-66 and $\text{LiNO}_3$ -UiO-66 Composites**

The crystallographic density of pristine UiO-66 is  $1.218 \text{ g cm}^{-3}$ . A 32 wt% loading of  $\text{NH}_4\text{NO}_3$  indicates an uptake of  $\sim 38$  oxidizer molecules per unit cell of the MOF ( $\text{Zr}_{24}\text{O}_{120}\text{C}_{192}\text{H}_{96}$ ) and the PXRD indicates no significant changes in the unit cell size (sum formula of the composite:  $\text{C}_{192}\text{H}_{248}\text{O}_{234}\text{N}_{76}\text{Zr}_{24}$ ). Therefore, the  $\text{NH}_4\text{NO}_3$ -UiO-66 composite has a relatively high density of  $1.787 \text{ g cm}^{-3}$ . Whereas UiO-66 is non-energetic with a highly negative oxygen balance of -88.2 %, loading of  $\text{NH}_4\text{NO}_3$  in UiO-66 results in composite with an oxygen balance of -53.9 %.

The  $\text{LiNO}_3$ -UiO-66 composite can be prepared with 38 wt% loading of the  $\text{LiNO}_3$ , which corresponds to about 58 molecules of the oxidizer per unit cell of the MOF (sum formula:  $\text{C}_{192}\text{H}_{96}\text{N}_{76}\text{O}_{294}\text{Li}_{58}\text{Zr}_{24}$ ). The composite has a high density of  $1.967 \text{ g cm}^{-3}$  and an oxygen balance of -32.7 %. In fact, both energetic composites  $\text{NH}_4\text{NO}_3$ -UiO-66 and  $\text{LiNO}_3$ -UiO-66 have oxygen balances far superior to TNT (-74.0 %).

Sensitivity of the energetic composites to impact was investigated by the small scale drop test method.<sup>1</sup> The salt-MOF composites  $\text{NH}_4\text{NO}_3$ -UiO-66 and  $\text{LiNO}_3$ -UiO-66 are insensitive with drop height higher than 217 cm, which is the maximum height for the apparatus used in our laboratory. The results indicate that, unlike the case of organic oxidizers, loading of inorganic oxidizers leads to impact insensitive energetic composites. Nonetheless, both energetic composites can be thermally initiated as evidenced from exothermic peaks in the DSC profiles of the composites (see Figs. 4 and 7 in the primary manuscript). To test the thermal sensitivities further, sealed in DSC pans containing  $\sim 12 \text{ mg}$   $\text{LiNO}_3$ -UiO-66 composites were placed in glass tubes and heated with a propane torch, and high-speed imaging of the thermal decomposition was carried out at 10000 frames per second. The  $\text{LiNO}_3$ -UiO-66 composite indeed undergoes rapid

decomposition with rapid gas release and sharp emission of sound (c.f. movie provided separately in the ESI). Therefore, the salt-MOF composites are impact insensitive and thermally stable energetics that may find applications such as drilling of deep oil wells.<sup>2</sup>

## References

- (1) Landenberger, K. B.; Bolton, O.; Matzger, A. J. Energetic–Energetic Cocrystals of Diacetone Diperoxide (DADP): Dramatic and Divergent Sensitivity Modifications via Cocrystallization. *J. Am. Chem. Soc.* **2015**, *137* (15), 5074–5079. <https://doi.org/10.1021/jacs.5b00661>.
- (2) Agrawal, J. P. Some New High Energy Materials and Their Formulations for Specialized Applications. *Propellants Explos. Pyrotech.* **2005**, *30* (5), 316–328. <https://doi.org/10.1002/prop.200500021>.
